# Supplementary material for: Compact carbon nitride based copolymer films with controllable thickness for photoelectrochemical water splitting
Source: Royal Society of Chemistry journal article supplement (doi:10.1039/c7ta06081e), 2017-01-01
Supplement: c7ta06081e1.pdf [file c7ta06081e1.pdf]

## **Compact carbon nitride based copolymer film with controllable thickness for photoelectrochemical water splitting**

Quan Gu <sup>a,b</sup>, Xuezhong Gong <sup>b</sup>, Qiaohui Jia <sup>a</sup>, Jianni Liu <sup>a</sup>, Ziwei Gao <sup>a</sup>, Xuxu Wang <sup>c</sup>, Jinlin  
Long <sup>c</sup>, Can Xue <sup>b\*</sup>

<sup>a</sup> Key Laboratory of Applied Surface and Colloid Chemistry, Ministry of Education, School  
of Chemistry and Chemical Engineering, Shaanxi Normal University, Xi'an, 710062, China.

<sup>b</sup> School of Materials Science and Engineering, Nanyang Technological University, 50  
Nanyang Avenue, Singapore 639798, Singapore

<sup>c</sup> State Key Laboratory of Photocatalysis on Energy and Environment, Fuzhou University,  
Fuzhou, 350002, P. R. China

Corresponding Author

\*E-mail: [cxue@ntu.edu.sg](mailto:cxue@ntu.edu.sg)

### Preparation of g-C<sub>3</sub>N<sub>4</sub>/FTO photoelectrode

Typically, the FTO glass with a size of 1.0×2.5 cm was washed in turn with acetone, ethanol, and DI water under continuous sonication, and then dried in N<sub>2</sub> flowing. By dispersing a certain amount of g-C<sub>3</sub>N<sub>4</sub> in water, the sample slurry was obtained and used for spreading onto the cleaned FTO glass substrate (photoactive area of 1.5 cm<sup>2</sup>), and dried at room temperature. Uncoated areas on the electrode were isolated with insulating tape.

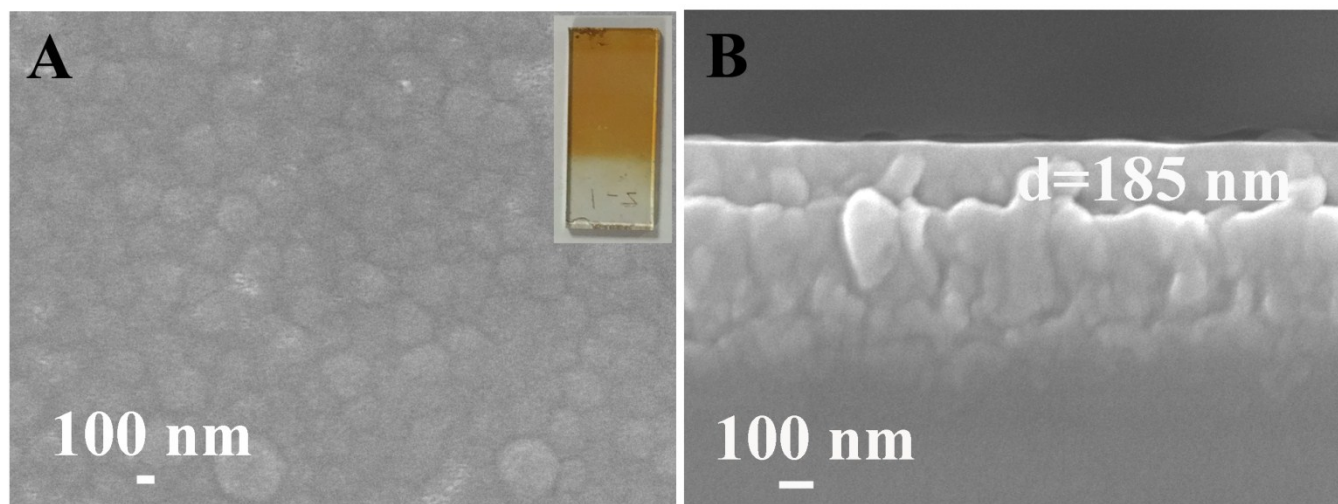

Figure S1 SEM images of top view (A) and cross section (B) of CNBC/FTO obtained at 400 °C annealing. Inset of A shows its digital photograph.

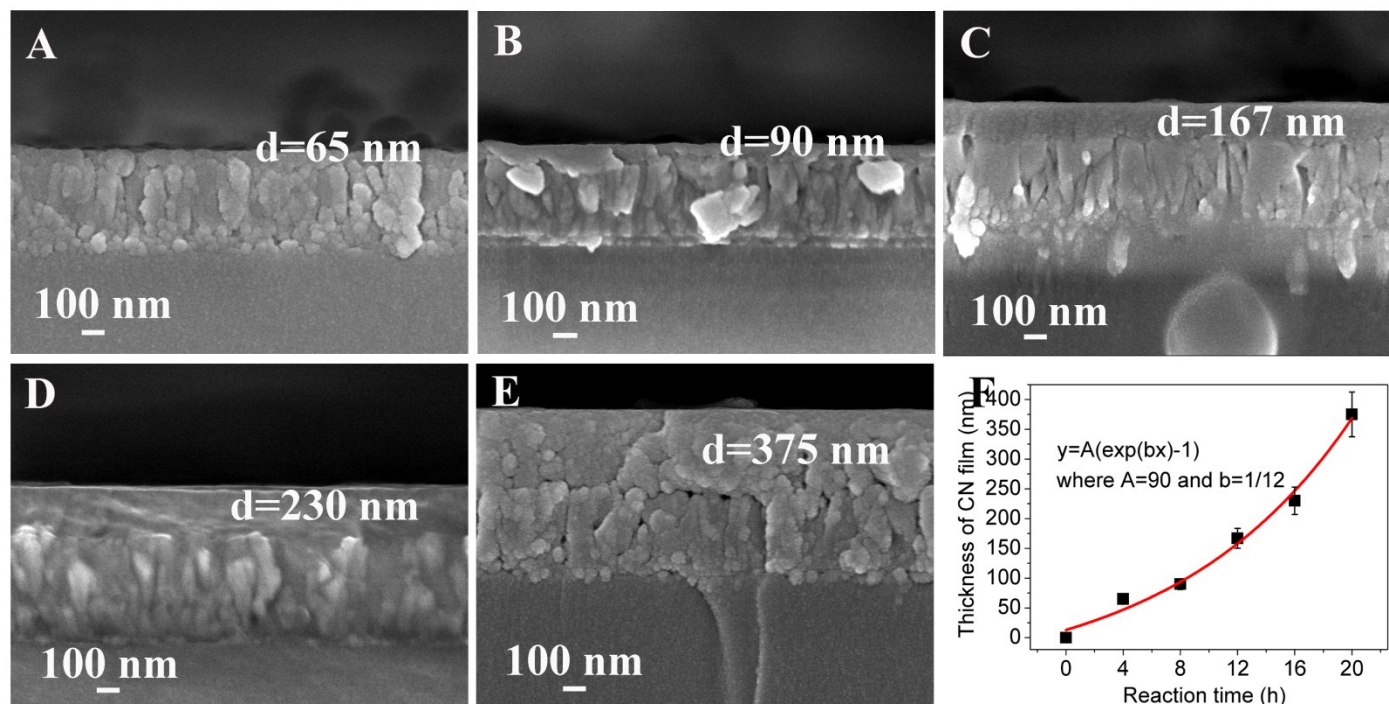

Figure S2 SEM images of cross section of as-prepared CNBC-U/FTO film obtained by different reaction time. (A) 4 h, (B) 8 h, (C) 12 h, (D) 16 h, (E) 20 h. (F) shows the relationship between reaction time and thickness of CNBC-U film

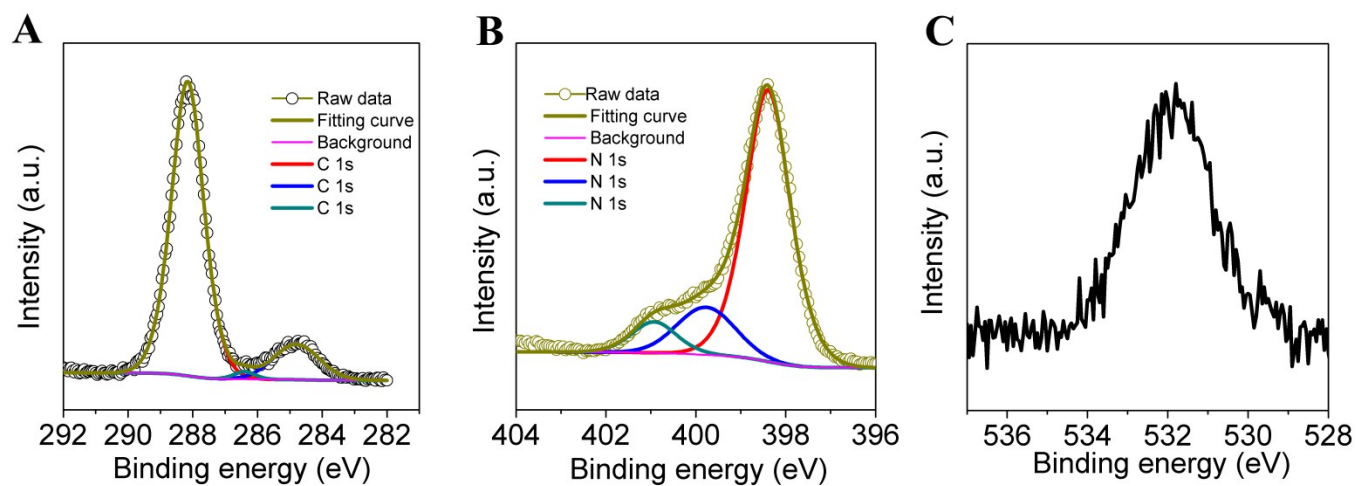

Figure S3 the high-resolution C 1s (A), N 1s (B), and O 1s (C) XPS spectra of g-C<sub>3</sub>N<sub>4</sub>/FTO.

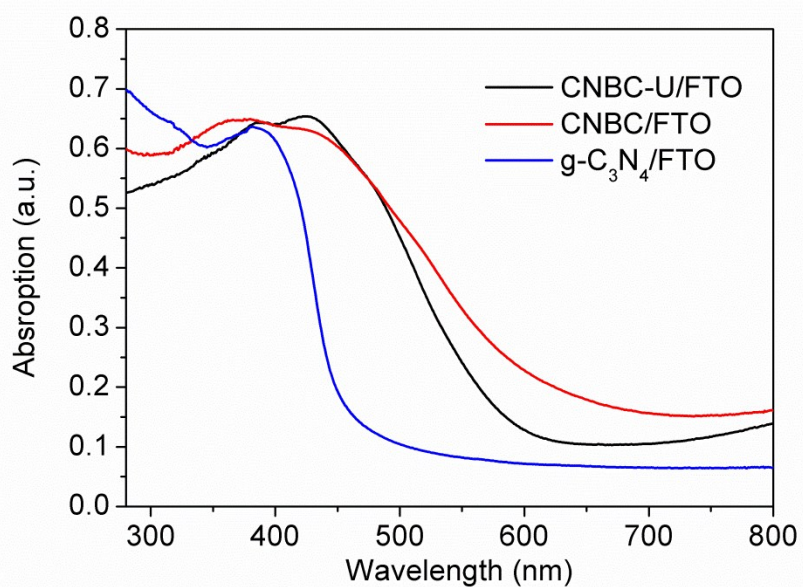

Figure S4 UV-visible absorption spectra of CNBC-U/FTO, CNBC/FTO and g-C<sub>3</sub>N<sub>4</sub>/FTO.

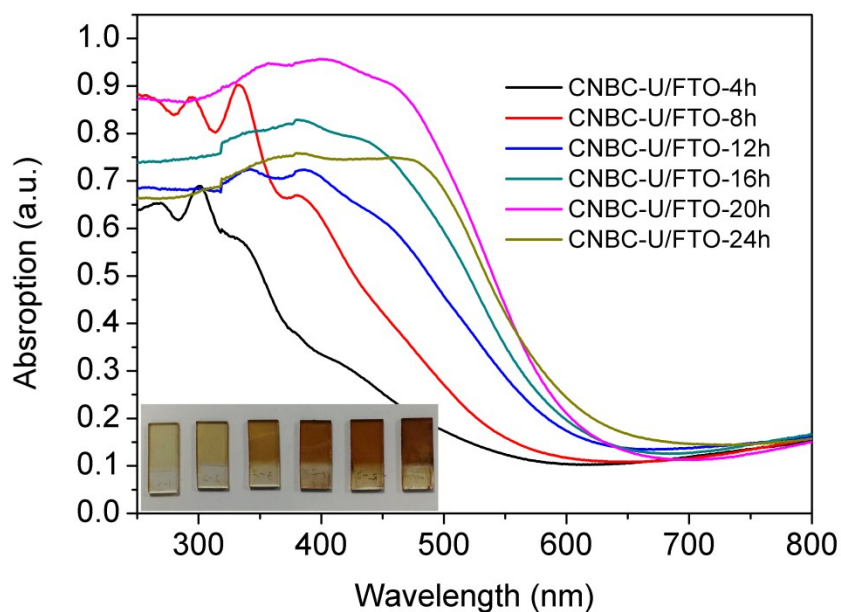

Figure S5 UV-Vis absorption spectra of as-prepared CNBC-U/FTO film obtained at different reaction time; inset shows the picture of CNBC-U/FTO film obtained after reaction time for 4 h, 8 h, 12 h, 16 h, 20 h, 24 h.

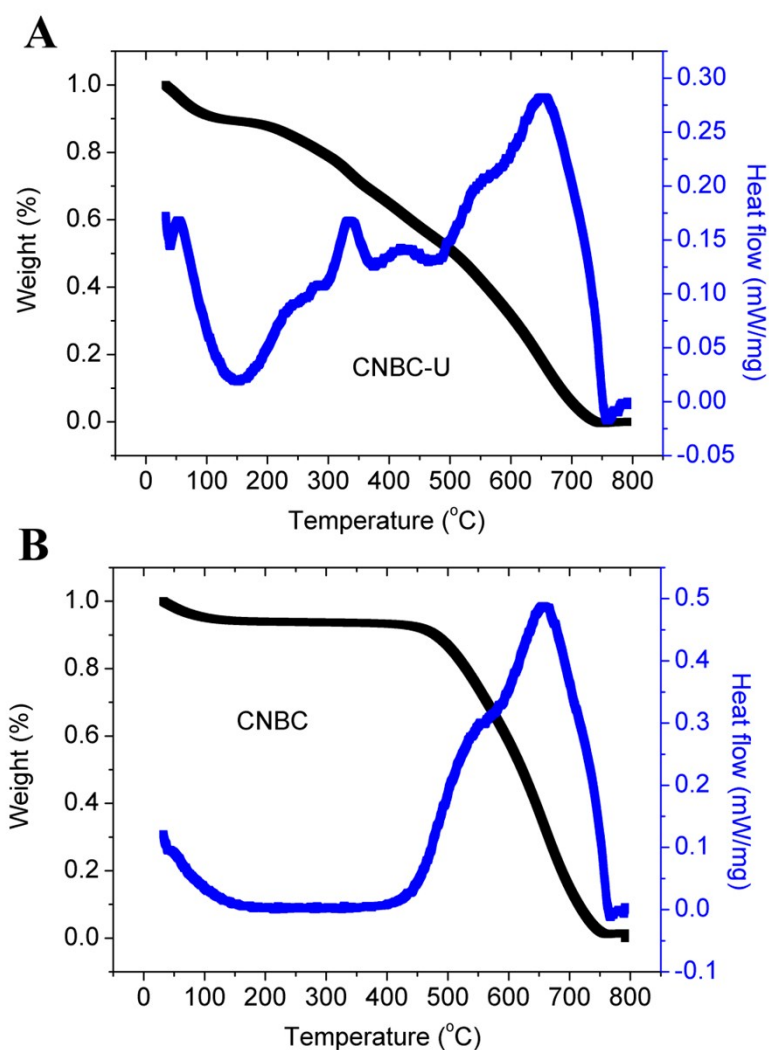

Figure S6 TGA and DSC curves of CNBC-U and CNBC powders measured in air and  $N_2$ .



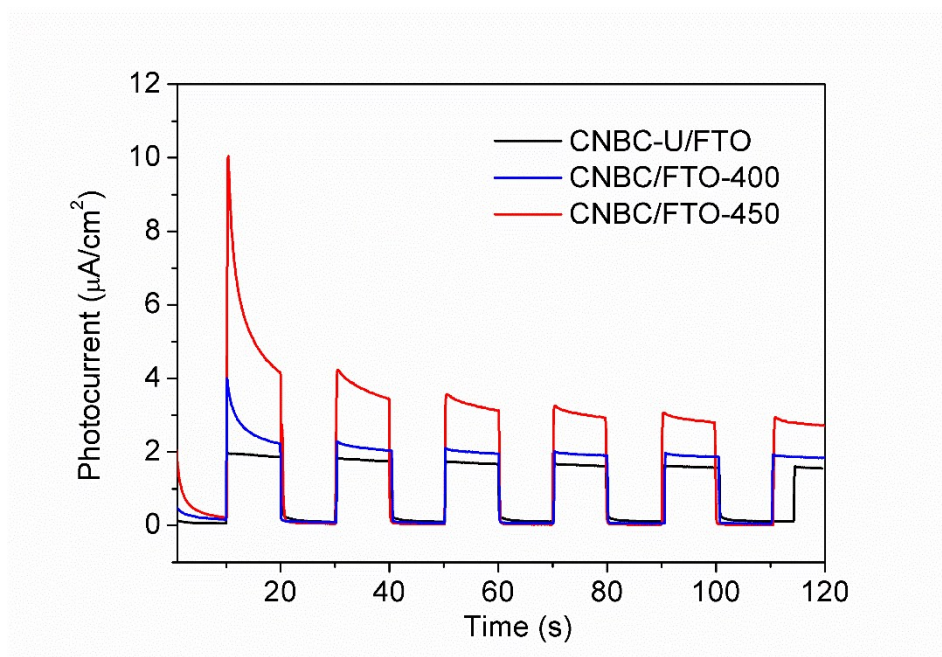

Figure S7 Photocurrent (i-t curve) of CNBC-U/FTO and CNBC/FTO annealed at different temperature (400 °C and 450 °C).

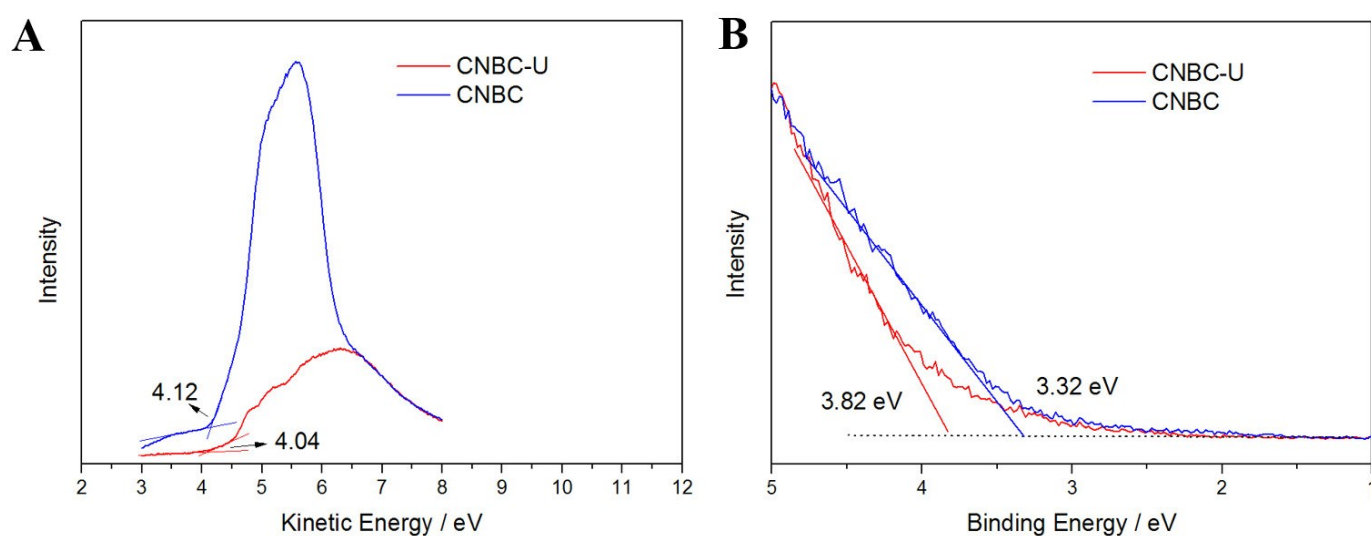

Figure S8 Results of Ultraviolet photoelectron spectroscopy (UPS) for CNBC-U and CNBC. The fitted values shown in (A) indicate the work function (WF) of the samples, and should be calibrated with 0.7 eV bias to a reference gold standard. The fitted values shown in (B) indicate the valence band (VB) with respect to Fermi level. Therefore, the estimated valence band levels for CNBC-U and CNBC are estimated as 2.72 V and 2.3 V (vs. SHE), respectively, according to the following table.

|        | WF<br>(Figure S8A) | WF calibrated<br>(with 0.7 eV bias) | VB-Fermi<br>(Figure S8B) | VB vs. vacuum<br>(WF calibrated + VB-Fermi) | VB vs. SHE<br>(SHE as -4.44 eV against vacuum level) |
|--------|--------------------|-------------------------------------|--------------------------|---------------------------------------------|------------------------------------------------------|
| CNBC-U | 4.04               | 3.34                                | 3.82                     | 7.16                                        | 2.72                                                 |
| CNBC   | 4.12               | 3.42                                | 3.32                     | 6.74                                        | 2.3                                                  |

Table S1. Element contents of C, N, O, and Cl determined by elemental analysis and XPS spectra.

| Samples                         | Elemental content (wt%) |      |     |     |      |      |     |      |
|---------------------------------|-------------------------|------|-----|-----|------|------|-----|------|
|                                 | Elemental analysis      |      |     |     | XPS  |      |     |      |
|                                 | C                       | N    | Cl  | H   | C    | N    | Cl  | O    |
| g-C <sub>3</sub> N <sub>4</sub> | 34.8                    | 58.2 | -   | 2.0 | 31.8 | 60.9 | 0   | 7.3  |
| CNBC-U                          | 31.0                    | 38.9 | 5.4 | 3.0 | 39.1 | 38.4 | 4.4 | 16.8 |
| CNBC                            | 40.6                    | 51.8 | 0   | 2.4 | 42.6 | 50.8 | 0   | 6.6  |
